# Supplementary material for: First-principles investigation of oxygen interaction with hydrogen/helium/vacancy irradiation defects in Ti3AlC2
Source: Royal Society of Chemistry journal article supplement (doi:10.1039/d0cp06462a), 2021-01-01
Supplement: d0cp06462a1.pdf [file d0cp06462a1.pdf]

## First-principles investigations of oxygen interaction with hydrogen/helium/vacancy irradiation defects in $\text{Ti}_3\text{AlC}_2$

Zhaocang Meng<sup>a,b,c</sup>, Canglong Wang<sup>\*a,c,d</sup>, Jitao Liu<sup>a,c</sup>, Yinlong Wang<sup>e</sup>,  
Xiaolu Zhu<sup>f</sup>, Lei Yang<sup>\*a,c,d</sup>, and Liang Huang<sup>b</sup>

<sup>a</sup> Institute of Modern Physics, Chinese Academy of Sciences, Lanzhou 730000, China.  
clwang@impcas.ac.cn, lyang@impcas.ac.cn

<sup>b</sup> School of Physical Science and Technology, Lanzhou University, Lanzhou 730000,  
China

<sup>c</sup> School of Nuclear Science and Technology, University of Chinese Academy of  
Sciences, Beijing 100049, China

<sup>d</sup> Advanced Energy Science and Technology Guangdong Laboratory, Huizhou 516000,  
China

<sup>e</sup> School of Nuclear Science and Technology, Lanzhou University, Lanzhou 730000,  
China

<sup>f</sup> College of Electrical Engineering, Longdong University, qingyang 745000, China

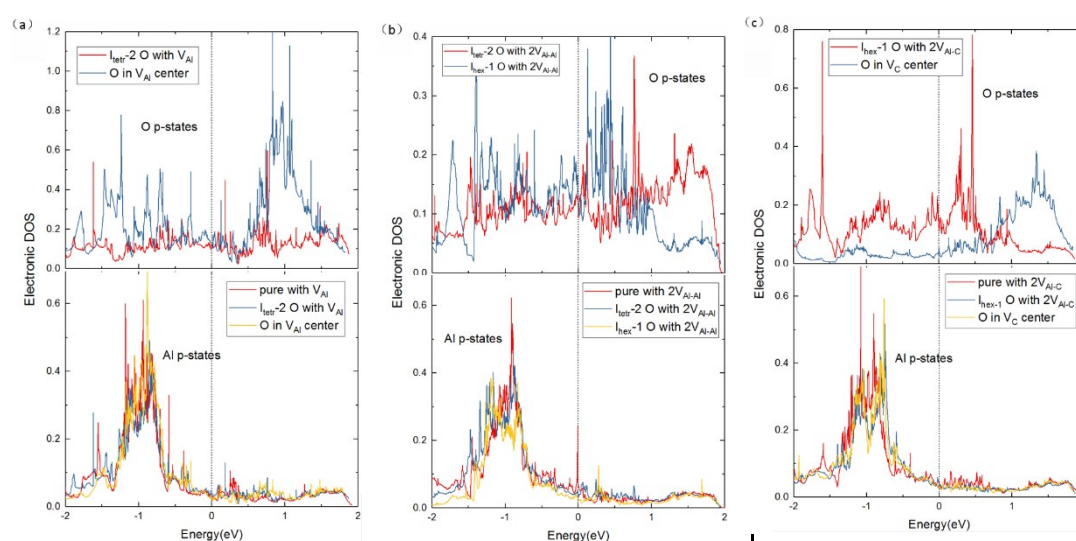

**Fig. S1** Local DOS for vacancy nearest-neighbor Al atom and interstitial O atom within (a)  $V_{\text{Al}}$  monovacancy; (b)  $2V_{\text{Al-AI}}$  divacancy; (c)  $2V_{\text{Al-C}}$  divacancy.
